# Supplementary material for: The South-American distribution and southernmost record of Biomphalaria peregrina —a potential intermediate host of schistosomiasis
Source: PeerJ journal article supplement (doi:10.7717/peerj.3401), 2017-05-30
Supplement: DNA_Sequences_(1).zip [file DNA_Sequences_%281%29.zip]

---

**Asunto:** GenBank BankIt submission. Submission ID: 1967775

---

**De:** gb-admin@ncbi.nlm.nih.gov (gb-admin@ncbi.nlm.nih.gov)

---

**Para:** robertovogler@yahoo.com.ar;

---

**Fecha:** Jueves, 10 de noviembre, 2016 19:20:00

---

Dear Roberto Vogler:

This confirms our receipt of your sequence submission data.  
Your submission ID is: 1967775

GenBank accession numbers will be assigned to your sequences within two working days, unless there are issues with your submission that we must ask you to explain first.

Submission to be released immediately after processing

If you have not done so previously and want to download a compressed file of your preliminary submission data, you can do so at <https://www.ncbi.nlm.nih.gov/WebSub/>

Thank you.

The GenBank Submissions Staff  
Bethesda, Maryland USA

\*\*\*\*\*  
[gb-admin@ncbi.nlm.nih.gov](mailto:gb-admin@ncbi.nlm.nih.gov) (for replies/updates to records in GenBank)  
[info@ncbi.nlm.nih.gov](mailto:info@ncbi.nlm.nih.gov) (for general questions regarding GenBank)  
\*\*\*\*\*
